# Supplementary material for: Tuning linear dichroism/birefringence (LDLB) contributions in VCD spectra of tartaric acid-TPPS 4 porphyrin films
Source: Royal Society of Chemistry journal article supplement (doi:10.1039/d5cp03069b), 2025-01-01
Supplement: d5cp03069b1.pdf [file d5cp03069b1.pdf]

## Supporting information

### Tuning linear dichroism/birefringence (LDLB) contributions in VCD spectra of tartaric acid-TPPS<sub>4</sub> porphyrin films

Giuseppe Mazzeo, Marco Fusè, Sergio Abbate, Roberto Zagami, Maria Angela Castriciano, Andrea Romeo, Luigi Monsù Scolaro, Giovanna Longhi

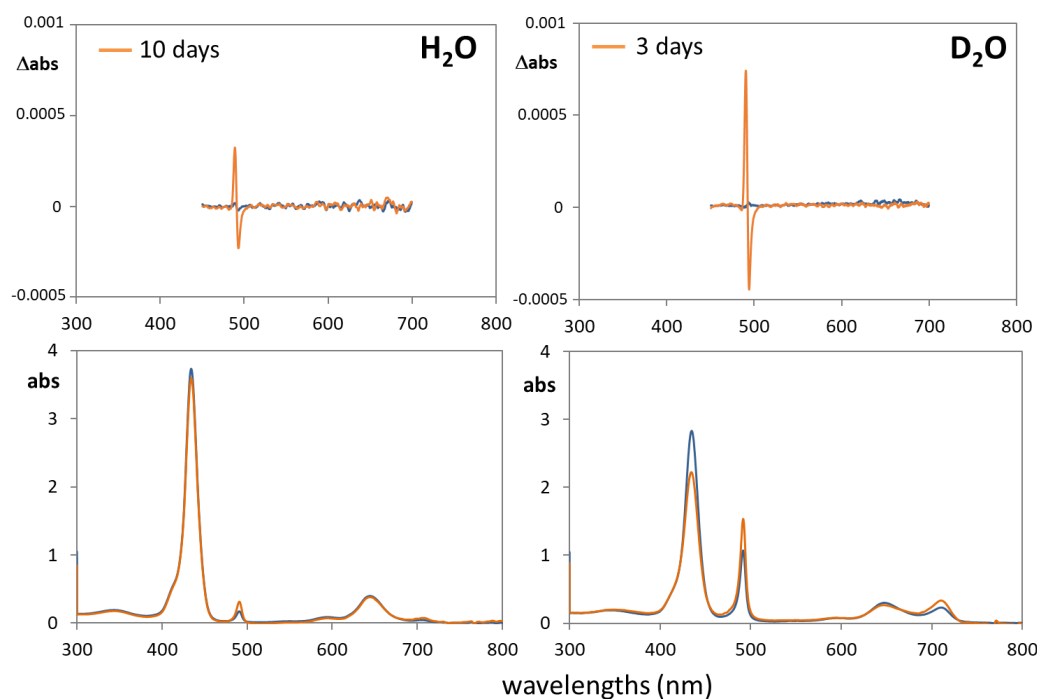

**Figure S1.** ECD (upper panels) and UV (lower panels) spectra in H<sub>2</sub>O (left) and D<sub>2</sub>O (right) solutions of 1 mM solutions of TPPS<sub>4</sub>. Blue lines refer to fresh recorded solutions. Orange lines refer to ECD-UV spectra of H<sub>2</sub>O and D<sub>2</sub>O recorded after ten and three days respectively. (0.1 mm quartz cuvette employed).

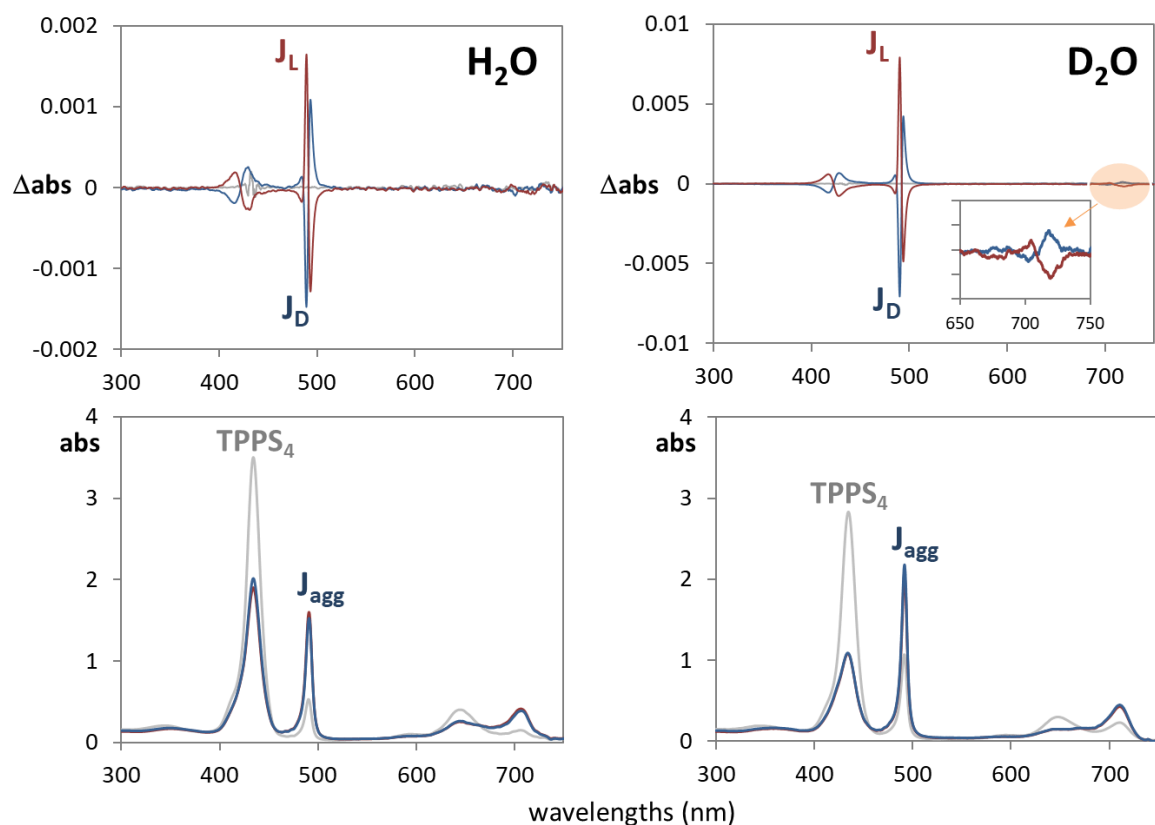

**Figure S2.** ECD (upper panels) and UV (lower panels) spectra in solution of  $H_2O$  (left) and  $D_2O$  (right) of J-aggregates  $J_D$  (blue lines) and  $J_L$  (red lines). Grey lines refer to 1 mM  $TPPS_4$  solution. In upper-right panel inset we repeat the magnified portion of the spectra in the 750-650 nm Q bands range. Experimental conditions:  $[TPPS_4] = 0.6$  mM;  $[TA] = 40$  mM. Molar ratio  $[TA/TPPS_4] \approx 67$ . (0.1 mm quartz cuvette employed).

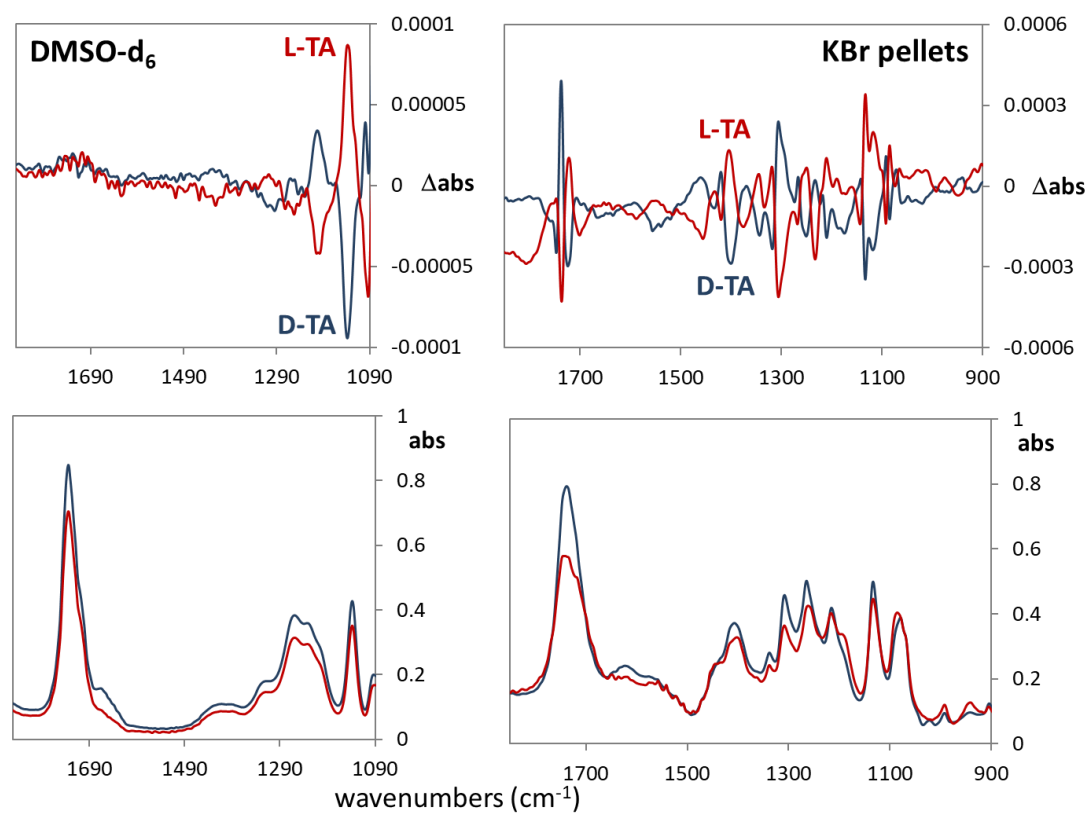

**Figure S3.** VCD and IR spectra of D/L-TA in DMSO- $\text{d}_6$  solution (left panels) and as KBr pellets (right panels). For the experimental conditions see text.

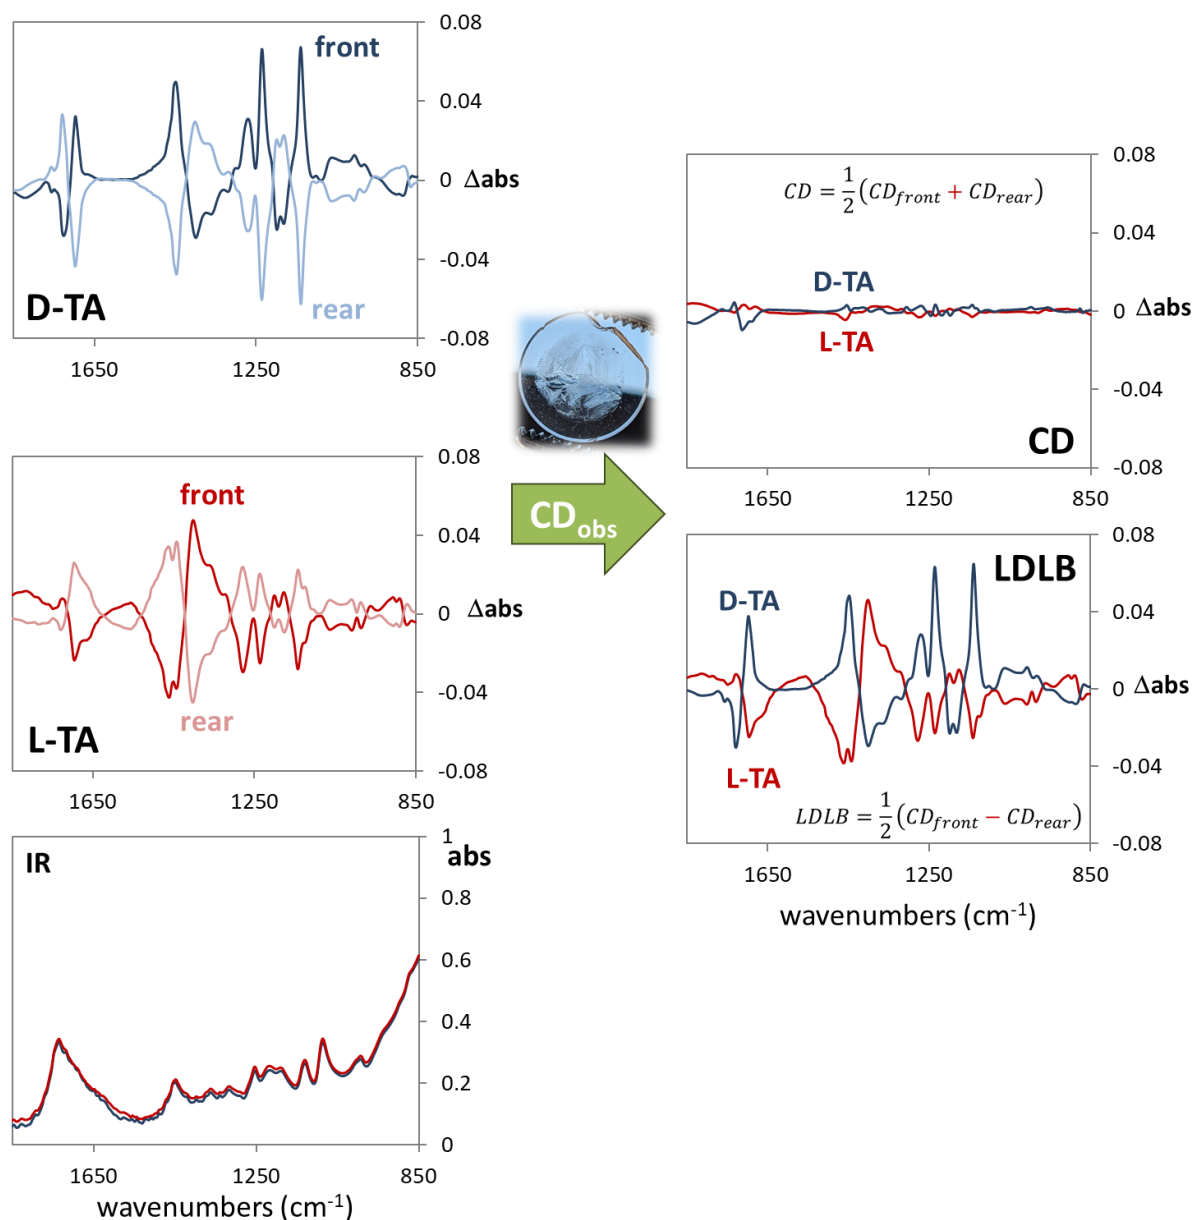

**Figure S4.** Left panels: Film VCD and IR spectra of mere TA. Comparison between front/rear (dark/light color traces) position of films of D-TA (blue lines) and L-TA (red lines). Right panels: Derived D-TA (blue lines) and L-TA (red lines) true CD (CD, upper panels) and anisotropic contribution (LDLB, lower panels) obtained as reported in equations (2) in the text.

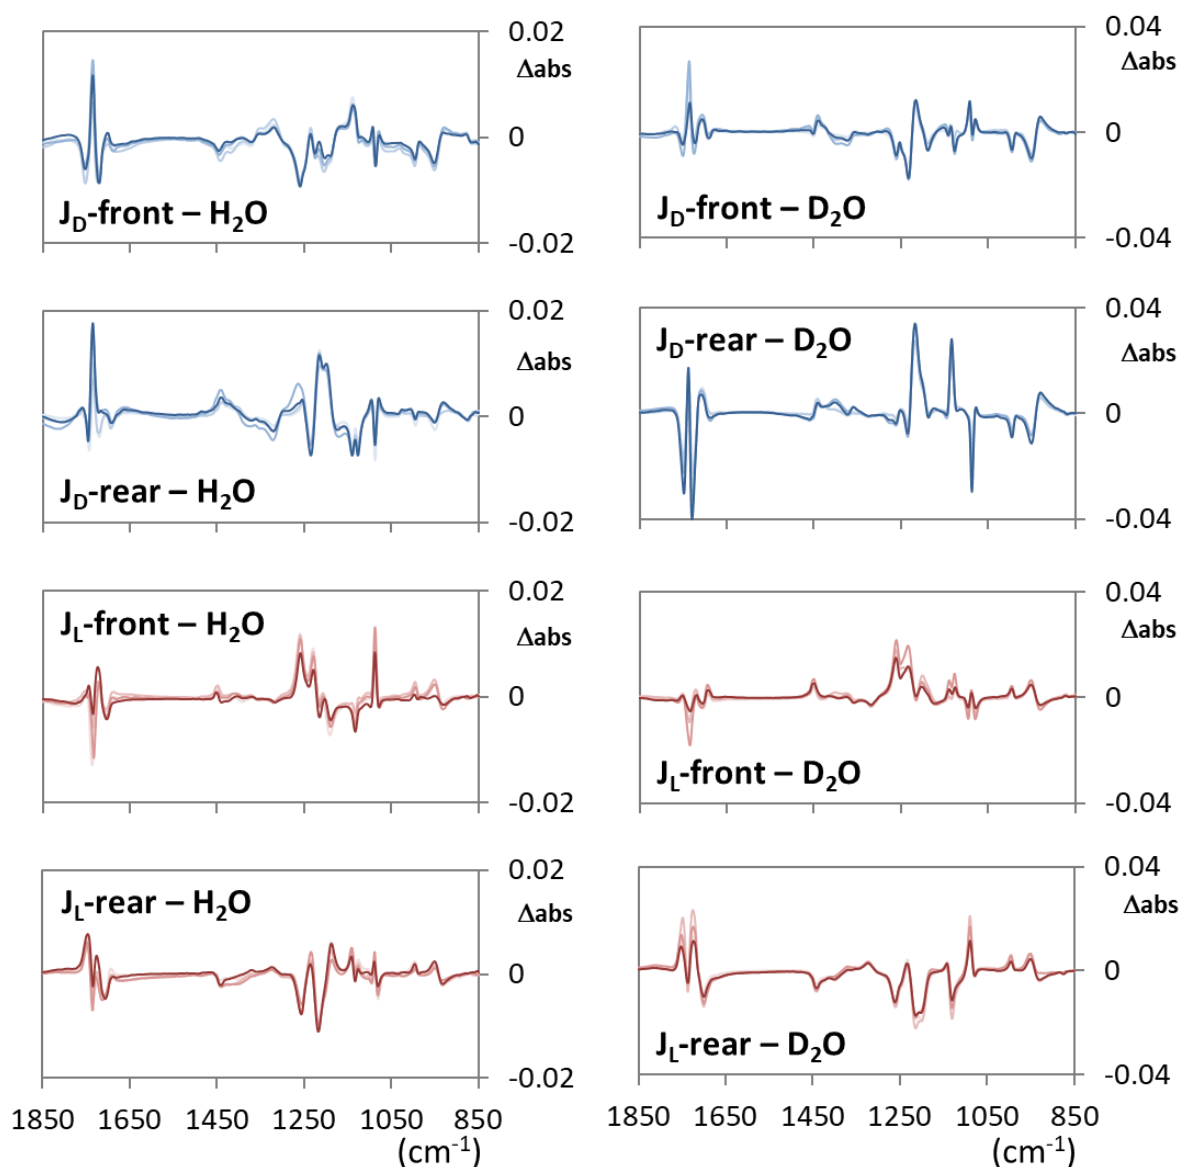

**Figure S5.** VCD spectra of solid film of  $\text{J}_\text{D}$  (blue lines) and  $\text{J}_\text{L}$  (red lines) rotating sample in four  $90^\circ$  steps, and in “front” and “rear” setup. Depicted VCD spectra refer to  $\text{H}_2\text{O}$  (left panels) and  $\text{D}_2\text{O}$  (right panels) drop cast solutions on  $\text{CaF}_2$  plates. Experimental conditions:  $[\text{TPPS}_4] = 0.6 \text{ mM}$ ;  $[\text{TA}] = 40 \text{ mM}$ . Molar ratio  $[\text{TA}/\text{TPPS}_4] \approx 67$ .

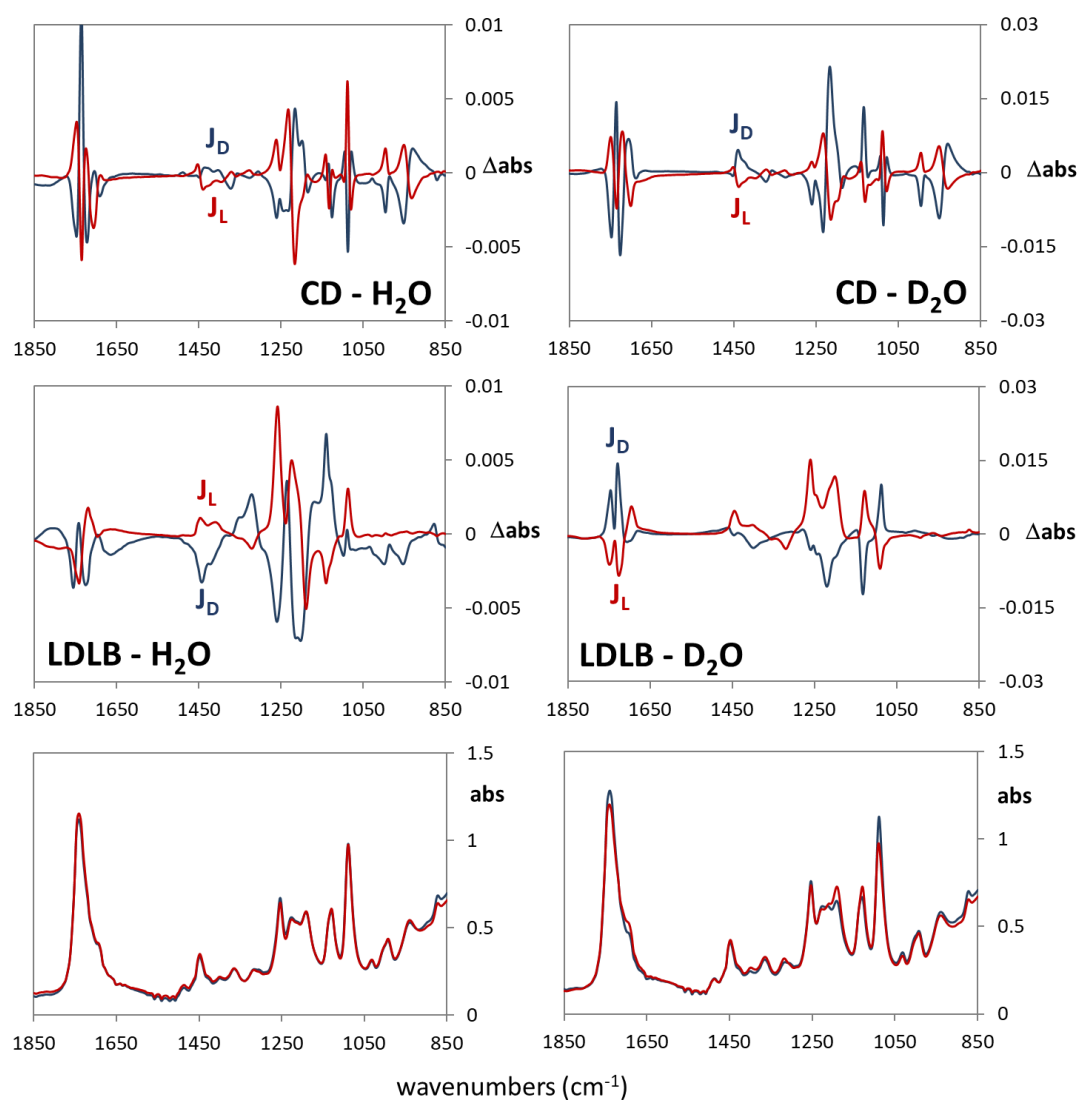

**Figure S6.** Comparison of  $J_D$  (blue lines) and  $J_L$  (red lines) CD (top panels), LDLB (middle panels) and IR spectra (lower panels) aggregates in drop cast films.  $H_2O$  (left panels) and  $D_2O$  (right panels). Experimental conditions:  $[TPPS_4] = 0.6 \text{ mM}$ ;  $[TA] = 40 \text{ mM}$ . Molar ratio  $[TA/TPPS_4] \approx 67$

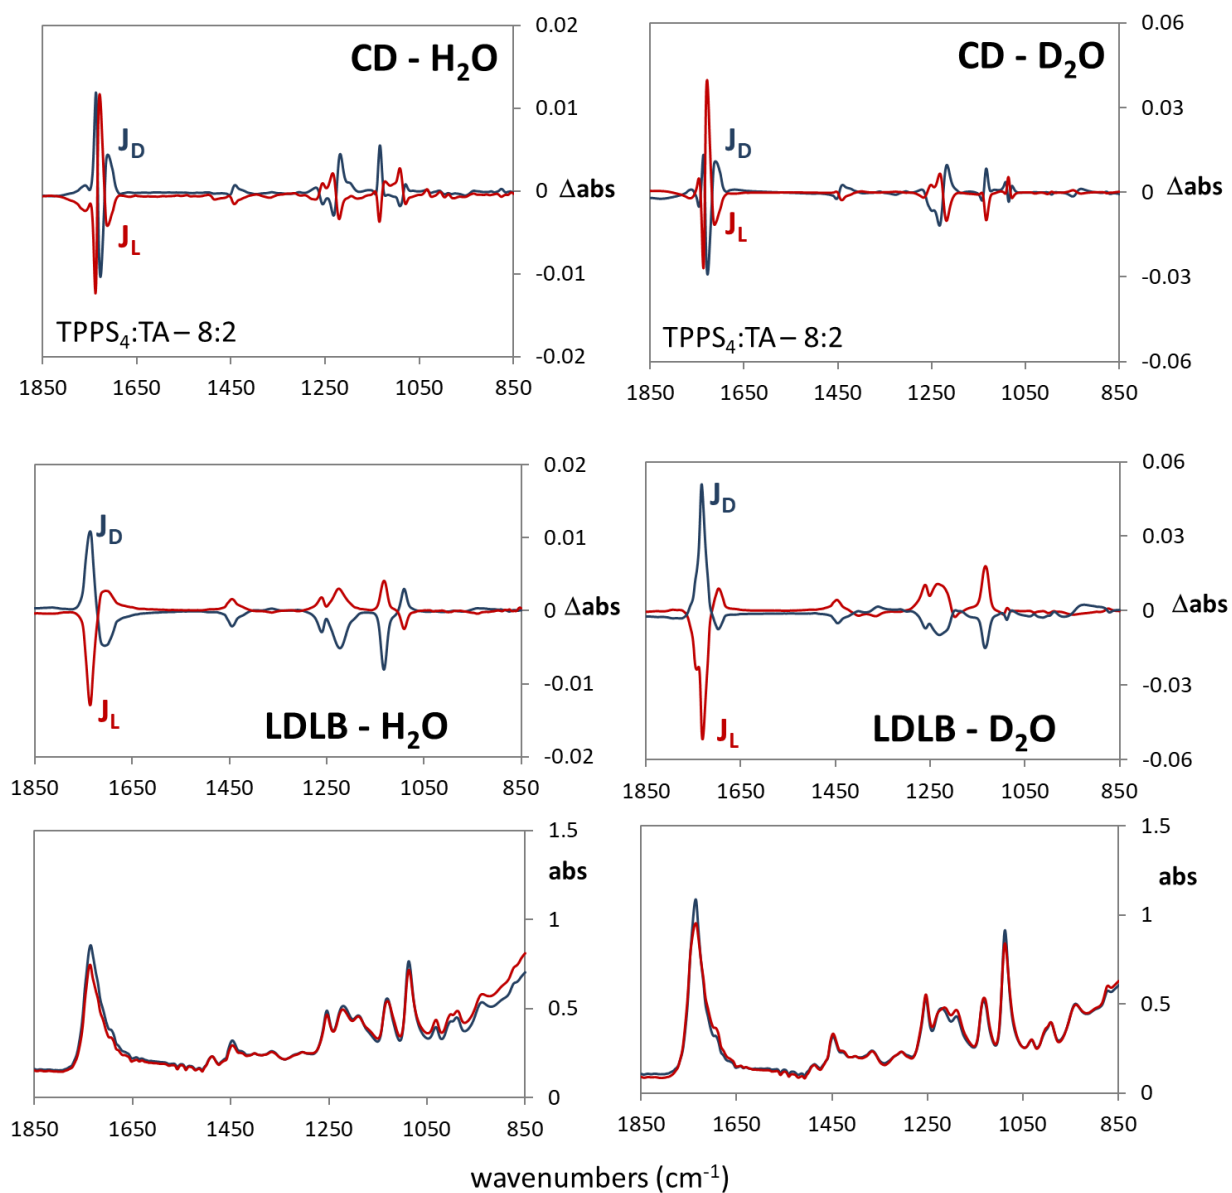

**Figure S7** Comparison of J<sub>D</sub> (blue lines) and J<sub>L</sub> (red lines) CD (top panels), LDLB (middle panels) and IR spectra (lower panels). . Experimental conditions: [TPPS<sub>4</sub>] = 0.8 mM; [TA] = 20 mM (lower panel). Molar ratio [TA/TPPS<sub>4</sub>] ≈ 25. Depicted VCD spectra refer to H<sub>2</sub>O (left panels) and D<sub>2</sub>O (right panels) drop cast solutions on CaF<sub>2</sub> plates.

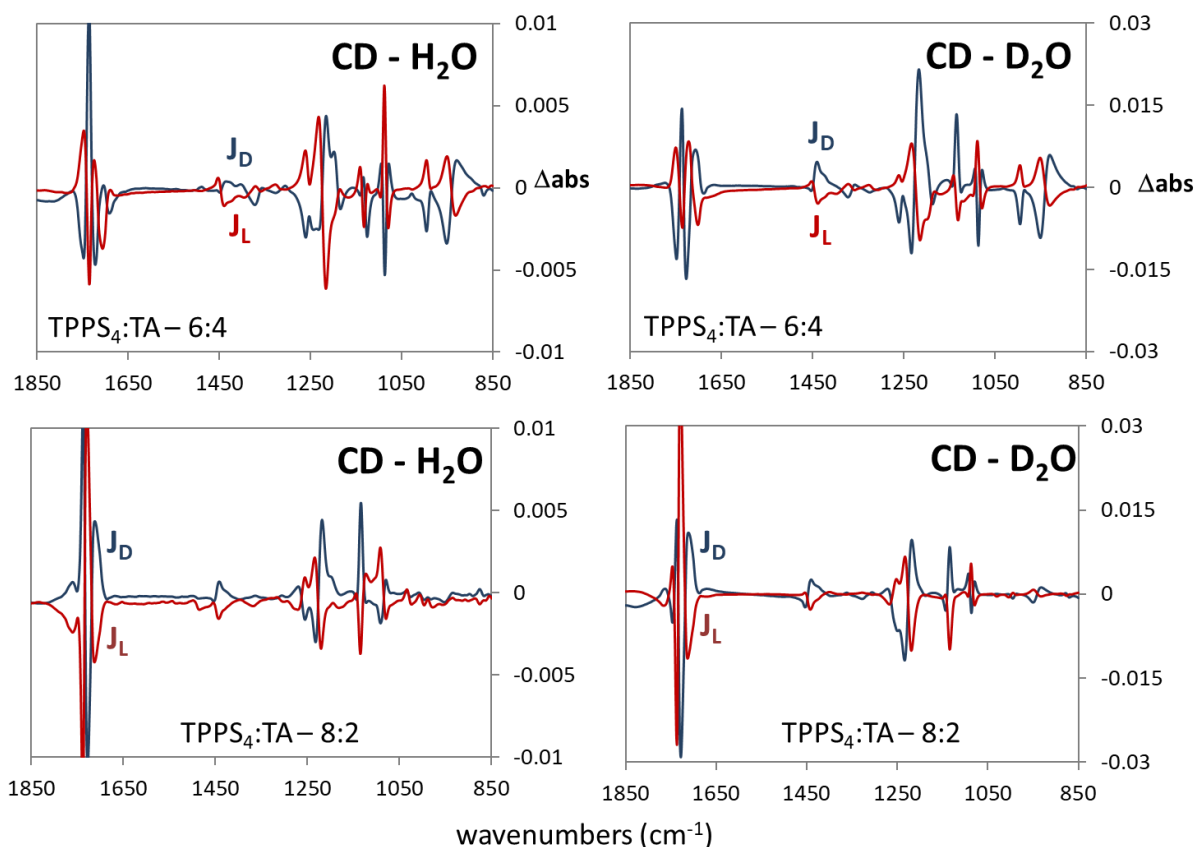

**Figure S8** 850-1850 cm<sup>-1</sup> range. Comparison of J<sub>D</sub> (blue lines) and J<sub>L</sub> (red lines) VCD spectra “true” CD obtained as reported in equations (2). Upper panels experimental conditions: [TPPS<sub>4</sub>] = 0.6 mM; [TA] = 40 mM (lower panel). Molar ratio [TA/TPPS<sub>4</sub>] ≈ 67. Lower panels experimental conditions: [TPPS<sub>4</sub>] = 0.8 mM; [TA] = 20 mM (lower panel). Molar ratio [TA/TPPS<sub>4</sub>] ≈ 25. Depicted VCD spectra refer to H<sub>2</sub>O (left panels) and D<sub>2</sub>O (right panels) drop cast solutions on CaF<sub>2</sub> plates.



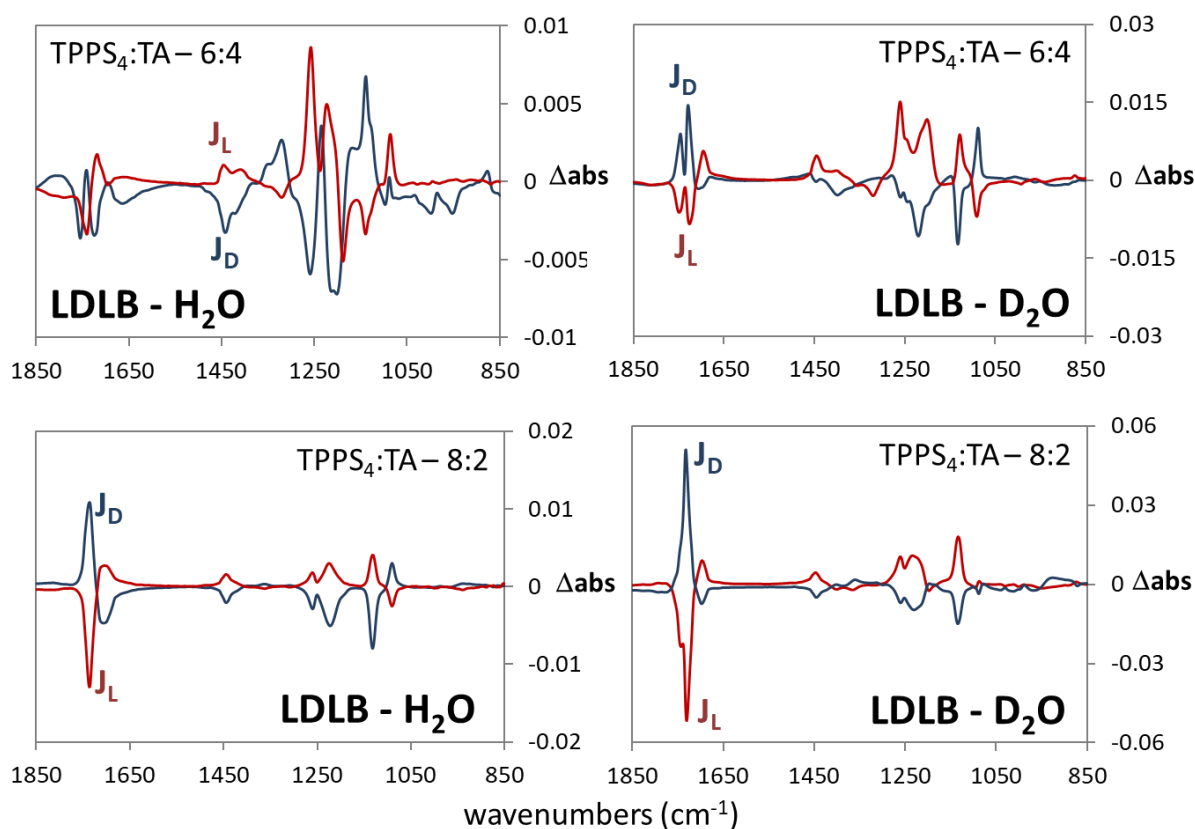

. **Figure S9** 850-1850 cm<sup>-1</sup> range. Comparison of J<sub>D</sub> (blue lines) and J<sub>L</sub> (red lines) VCD LDLB spectra, obtained as reported in equations (2). Upper panels experimental conditions: [TPPS<sub>4</sub>] = 0.6 mM; [TA] = 40 mM (lower panel). Molar ratio [TA/TPPS<sub>4</sub>] ≈ 67. Lower panels experimental conditions: [TPPS<sub>4</sub>] = 0.8 mM; [TA] = 20 mM (lower panel). Molar ratio [TA/TPPS<sub>4</sub>] ≈ 25. Depicted VCD spectra refer to H<sub>2</sub>O (left panels) and D<sub>2</sub>O (right panels) drop cast solutions on CaF<sub>2</sub> plates.

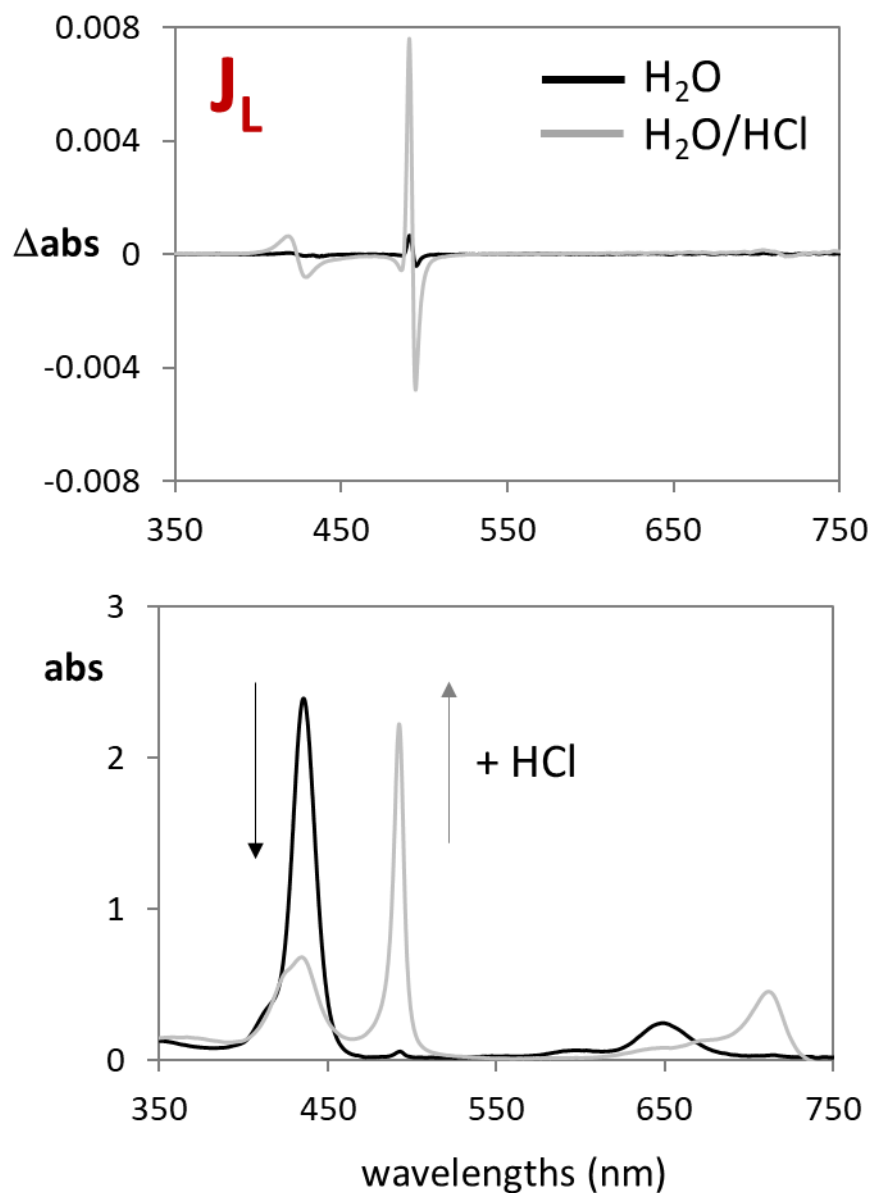

**Figure S10.** ECD (upper panel) and UV (lower panel) comparison spectra in solution of  $\text{H}_2\text{O}$  (black lines) and acidified  $\text{H}_2\text{O}$  (gray lines) of J-aggregate  $\text{J}_\text{L}$  solutions. (0.1 mm quartz cuvette; for the rest of experimental conditions see text)

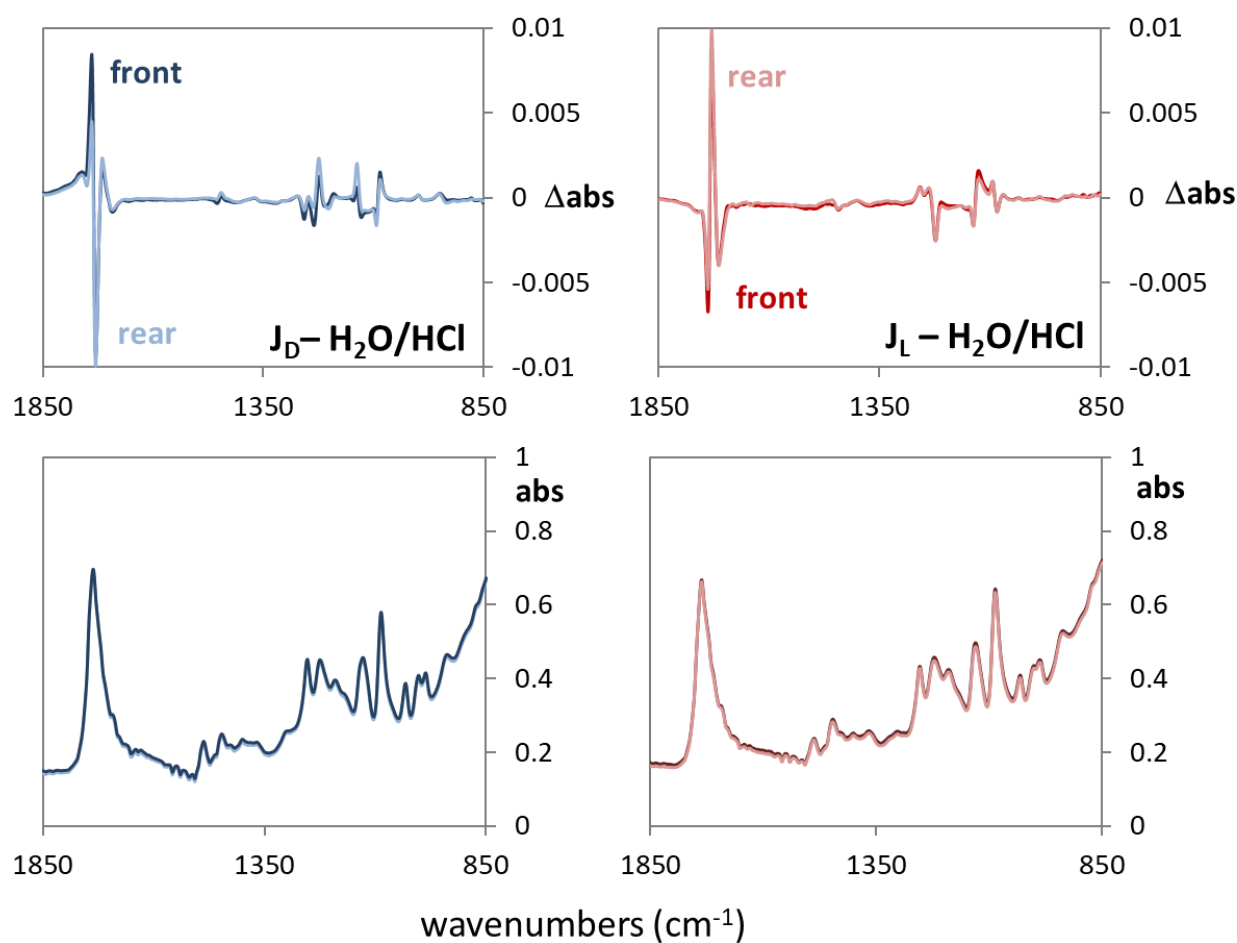

**Figure S11.** VCD (upper panels) and IR (lower panels) spectra comparison between front/rear (dark/light color traces) position of films of  $J_D$  (left) and  $J_L$  (right). Experimental conditions: drop cast film from  $\text{H}_2\text{O}/\text{HCl}$  solution on  $\text{CaF}_2$  plates:  $[\text{TPPS}_4] = 0.77 \text{ mM}$ ;  $[\text{TA}] = 19.2 \text{ mM}$ ;  $[\text{HCl}] = 38.5 \text{ mM}$ .

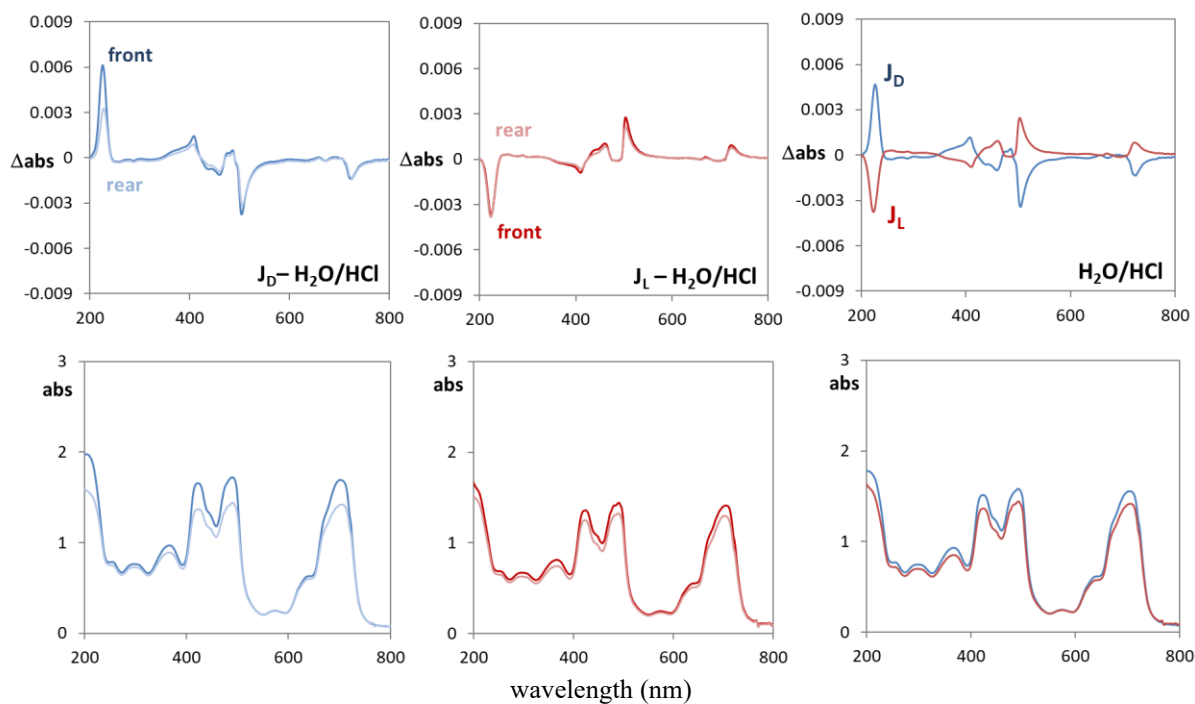

**Figure S12.** ECD (upper panels) and UV (lower panels) spectra comparison between front/rear (dark/light color traces) position of films of  $J_D$  (left)  $J_L$  (middle) and superposition of the average spectra for the two enantiomeric systems (right); Experimental conditions: drop cast film from  $H_2O/HCl$  solution on  $CaF_2$  plates:  $[TPPS_4] = 0.77$  mM;  $[TA] = 19.2$  mM;  $[HCl] = 38.5$  mM.

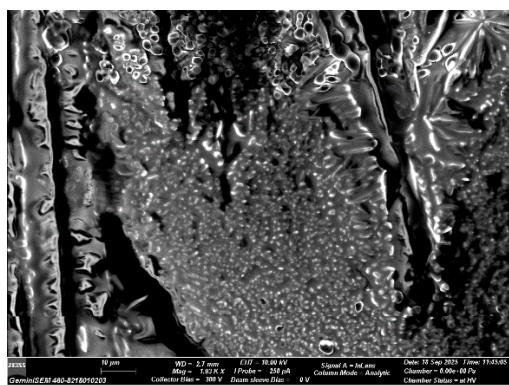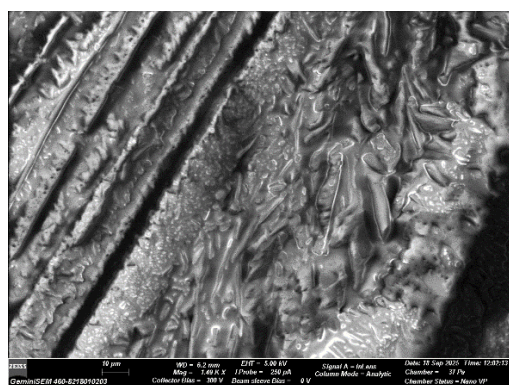

**a**

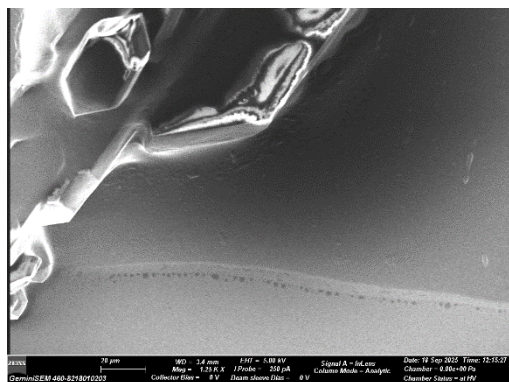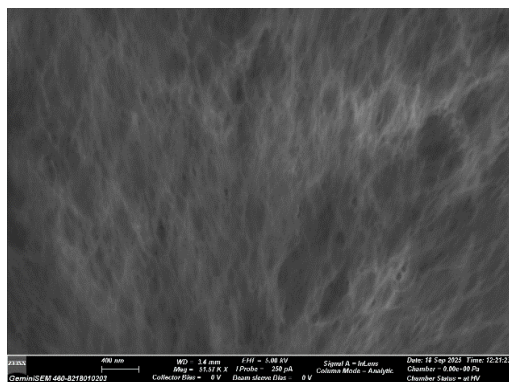

**b**

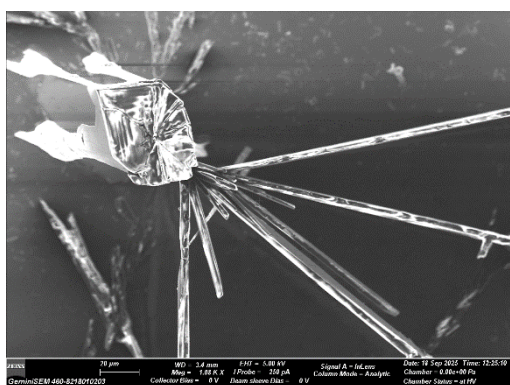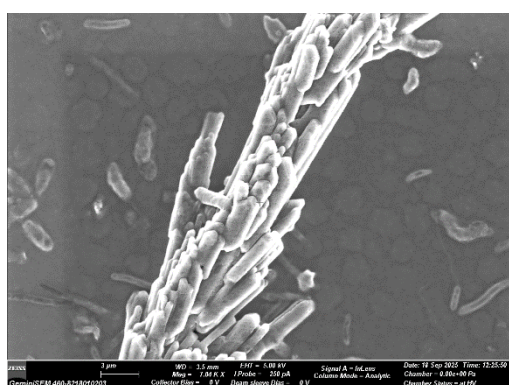

**c**

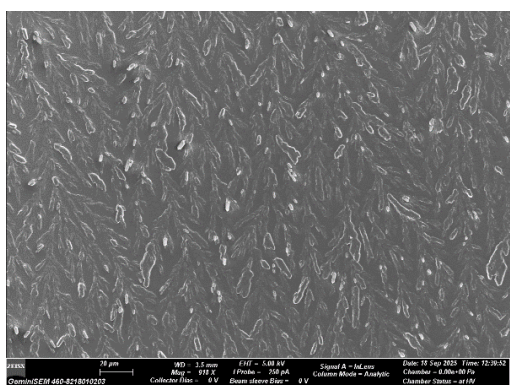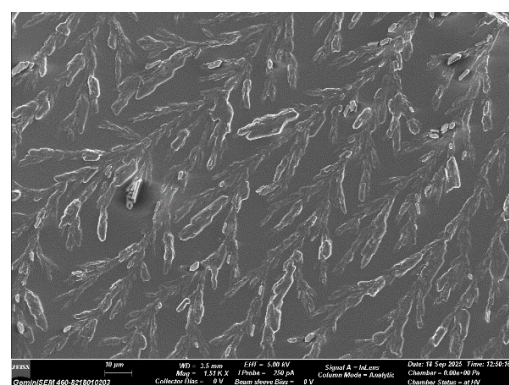

**d**

**Figure S13.** SEM images of a) TA, b) TA/J-aggregated TPPS<sub>4</sub> at [TA/TPPS<sub>4</sub>]  $\approx$  67, c) TA/J-aggregated TPPS<sub>4</sub> at [TA/TPPS<sub>4</sub>]  $\approx$  25, and d) TA/J-aggregated TPPS<sub>4</sub> at [TA/TPPS<sub>4</sub>]  $\approx$  67 after treatment with HCl. With the exclusion of the TA samples, right panels report higher magnification images. The samples were obtained by drop cast solutions of the samples used for the spectroscopic measurements directly onto Si wafer.



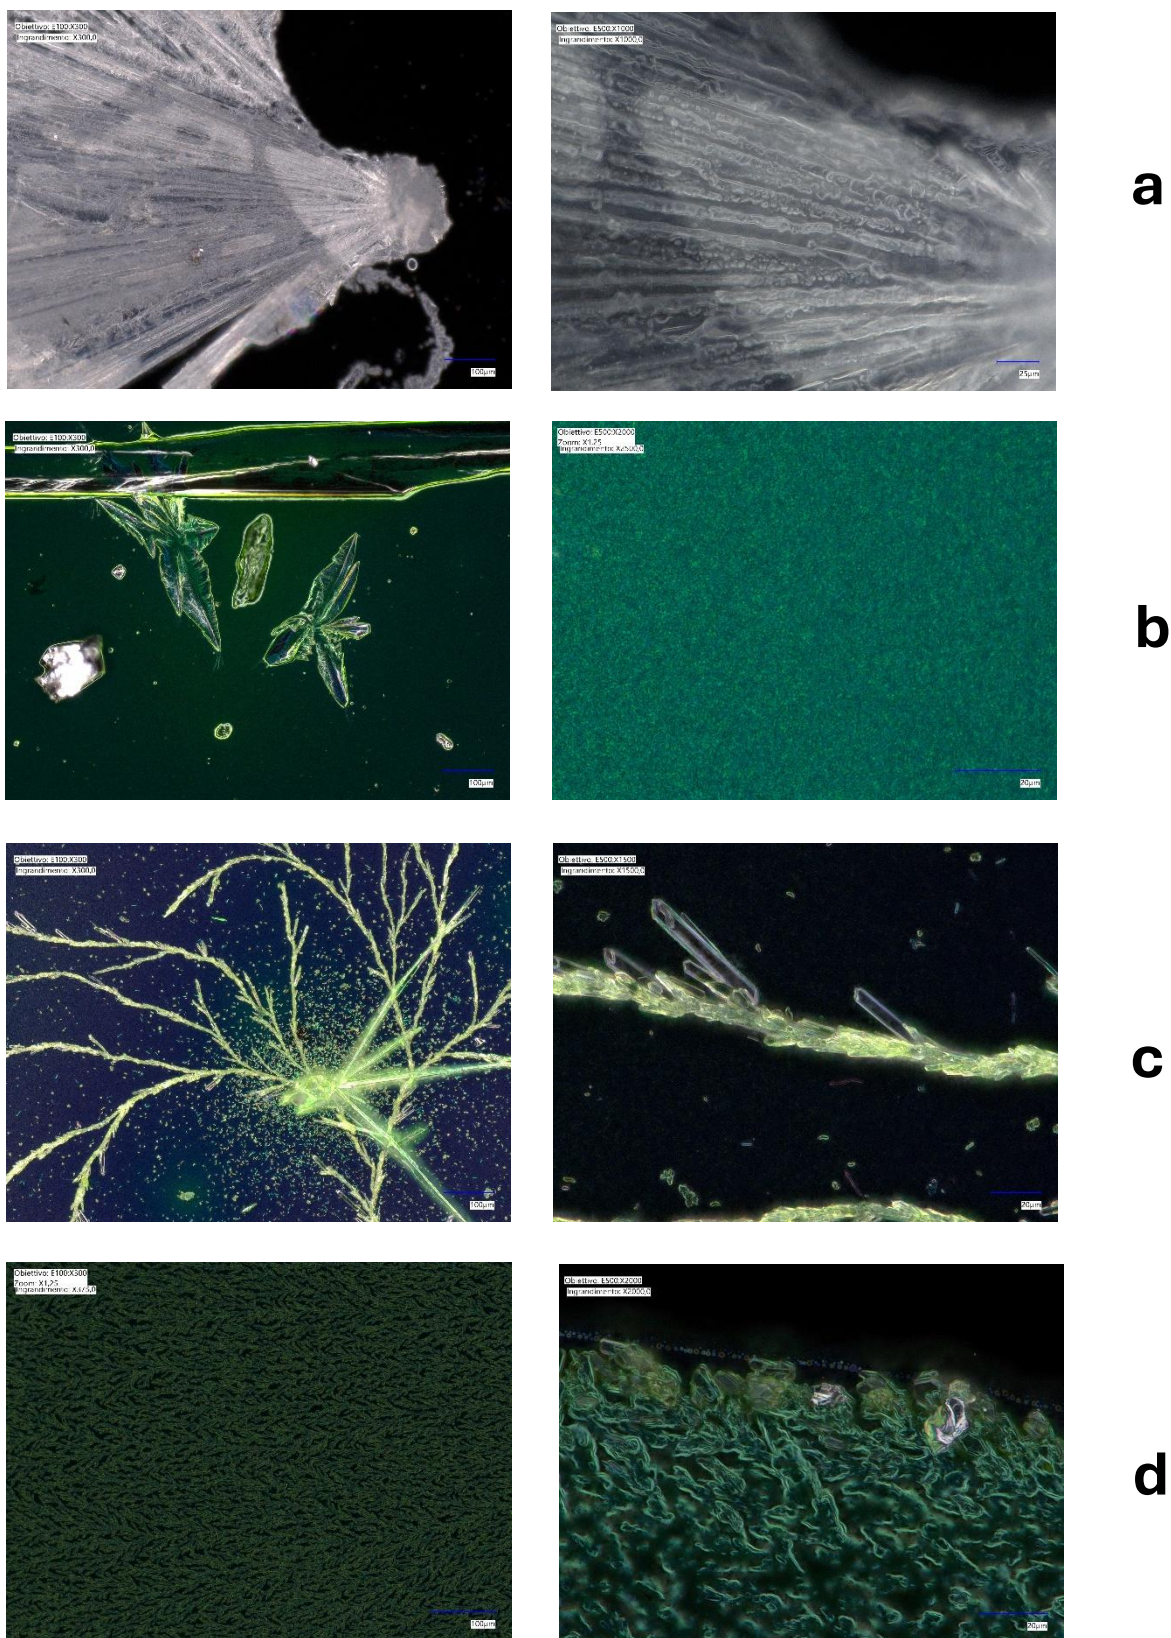

**Figure S14.** Dark field optical images of a) TA, b) TA/J-aggregated TPPS<sub>4</sub> at  $[TA/TPPS_4] \approx 67$ , c) TA/J-aggregated TPPS<sub>4</sub> at  $[TA/TPPS_4] \approx 25$ , and d) TA/J-aggregated TPPS<sub>4</sub> at  $[TA/TPPS_4] \approx 67$  after treatment with HCl. Right panels report higher magnification images. The samples were obtained by drop cast solutions of the samples used for the spectroscopic measurements directly onto Si wafer.
